# Supplementary material
Source: publisher figshare collection journal article supplement (https://acs.figshare.com/ndownloader/files/21064875)
Supplement: Supplementary file 1 [file 21064875]

# Supporting Information

## The Liquid-Liquid Phase Behavior of Solutions of 1,3-Diethylimidazolium Bis((trifluoromethyl) sulfonyl)amide in *n*-Alkyl Alcohols

*Marisa A. A. Rocha,<sup>1,‡</sup> Daniela Kerlé,<sup>1,2,§</sup> Johannes Kiefer,<sup>1,2,3</sup> Wolfram Schröer,<sup>4</sup>*

*and Bernd Rathke<sup>1\*</sup>*

<sup>1</sup> Technische Thermodynamik, Universität Bremen, Badgasteiner Str. 1, D - 28359 Bremen, Germany

<sup>2</sup> MAPEX Center for Materials and Processes, Universität Bremen, D - 28359 Bremen, Germany

<sup>3</sup> School of Engineering, University of Aberdeen, Fraser Noble Building, Aberdeen AB24 3UE, UK

<sup>4</sup> Institut für Anorganische und Physikalische Chemie, Leobener Str. NWII, D - 28359 Bremen,

Germany

(<sup>‡</sup> Current address: NALCO Water, An Ecolab Company. Ir.G.Tjalmaweg 1, 2342 BV Oegstgeest, The Netherlands.)

(<sup>§</sup> Current address: enosys Recycling GmbH, Am Baarssee 3, D - 23936 Grevesmühlen, Germany)

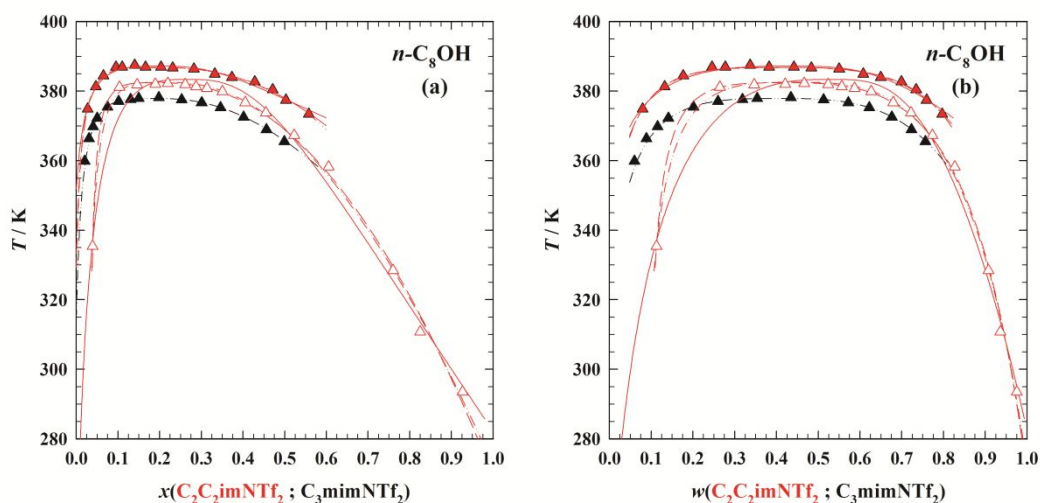

**Figure S1:** Isobaric phase diagrams at ambient pressure for a mixture of  $C_2C_2imNTf_2$  and octan-1-ol ( $n-C_nOH$  with  $n = 8$ ) (a) with  $x_{IL}$  as the mole fraction, and (b) with  $w_{IL}$  as the mass fraction of the IL (red symbols). For the sake of comparability, data from literature<sup>79</sup> are shown (open symbols). In order to allow a direct view and a perception of analogies, data from prior work with  $C_3mimNTf_2$  and  $n$ -alkyl alcohols are shown in black symbols.<sup>44</sup> The lines are results from fitting the experimental data by equation (1) (solid line —); equation (2) (dashed line - - -) and equation (3) (dashed dotted line - ·-·-). The corresponding parameters are listed in Table 3. For data from literature ( $C_3mimNTf_2$ ) only the fits by eq 3 are shown.

## References (excerpt):

44. Shao, X. W.; Schröer, W.; Rathke, B., Liquid-Liquid Phase Behavior of Solutions of 1,3-Dimethylimidazolium- and 1-Methyl-3-propylimidazolium Bis((trifluoromethyl)sulphonyl)amide ( $C_{1,3}mimNTf_2$ ) in  $n$ -Alkyl Alcohols. *J. Chem. Eng. Data* **2014**, 59, 225-233.
79. Domańska, U.; Rękawek, A.; Marciniak, A., Solubility of 1-Alkyl-3-ethylimidazolium-based Ionic Liquids in Water and 1-Octanol. *J. Chem. Eng. Data* **2008**, 53, 1126-1132.
